# Supplementary material
Source: PubMed Central journal article supplement (PMC5560796)
Supplement: 1895FileS1.pdf [file 1895FileS1.pdf]

## Supplementary Materials

### Figure legends

**Figure S1. GAL memory lasts for 14hours of growth in glucose.** Gal1-mCherry levels, normalized to the constitutively expressed CFP ( $P_{TDH}$ -CFP), during activation and reactivation after growth in glucose for 12h, 14h and 18h. Error bars represent SEM for  $\geq 3$  biological replicates of at least 5,000 cells.

**Figure S2. Memory Recruitment Sequence ( $MRS_{GAL1}$ ) regulated  $GAL1$  peripheral localization during memory is sensitive to the fluorescent marker for nuclear envelope.** A. Schematic of  $GAL1$  promoter fragments inserted next to the  $URA3:LacO$ . The + and - signs indicate fragments that did or did not lead to statistically significant peripheral localization under memory conditions (galactose  $\rightarrow$  glucose, 12h). The  $MRS_{GAL1}$  (-336 to -398 within the  $GAL1$  promoter) is sufficient to target  $URA3$  to nuclear periphery during memory. Colored boxes indicate the relative positions of the annotated *cis*-regulatory elements (BRICKNER *et al.* 2016). B. The red bars in the schematic represent the segments of the  $MRS_{GAL1}$  in which transversion mutations were introduced at every alternate base. Below: localization of wild-type and transversion mutants of  $MRS_{GAL1}$  inserted at  $URA3:LacO$  scored for peripheral localization under memory conditions.  $GAL1$  peripheral localization either in fixed cells using immunofluorescence (C) or in live cells (D) grown under repressing (glucose), activating (galactose) and memory (galactose  $\rightarrow$  glucose, 12h) conditions with and without overexpressed red fluorescent protein directed to either ER membrane (Heh2-L-mCherry; (MEINEMA *et al.* 2011; EGECIOGLU *et al.* 2014) or ER lumen (dsRed-HDEL; (GREEN *et al.* 2012). D. Left: Representative images of cells having LacO array integrated downstream of  $GAL1$  gene, expressing GFP-LacI (green) and Pho88-mCherry (red) and scored as localized to nucleoplasm or periphery. The hatched line represents the level of co-localization with the nuclear envelope predicted by chance

and error bars represent SEM from at least 3 independent replicates of 30-50 cells. Scale bar = 1  $\mu\text{m}$ . \*  $p \leq 0.05$  (Student's t-test) relative to repressing condition.

**Figure S3. Nup100-dependent *GAL1* peripheral localization during transcriptional memory.**

The experiments were done under repressing (glucose), activating (galactose) and memory (galactose  $\rightarrow$  glucose, 12h) conditions. A. ChIP of TAP-tagged Nup2 and Nup100. The enrichment for *GAL1* promoter and *RPA34* (negative control) in the IP was quantified relative to the input fraction by qPCR. B. Confocal images of cells with Nup2-FRB-GFP or Nup100-FRB-GFP before and after 1 h rapamycin treatment. Left: GFP fluorescence in live cells, imaged with identical settings. Right: immunofluorescence against Nsp1 shows that NPC number or structural integrity is not altered by anchor away of Nup2 or Nup100. Scale bar = 5  $\mu\text{m}$ . C. Peripheral localization of *GAL1* in live cells depleted of Nup2 and Nup100 by Anchor Away (HARUKI *et al.* 2008). The hatched line represents the level of co-localization with the nuclear envelope predicted by chance. Error bars represent SEM from at least 3 independent replicates of 30-50 cells. \*  $p \leq 0.05$  (Student's t-test) relative to the repressing condition.

**Figure S4. Gal1 expression levels upon shift from galactose to different sugars.** Gal1-mCherry levels, normalized to  $P_{TDH}$ -CFP, in cells that were transferred from galactose to galactose (gal.), glucose (glc.) or raffinose (raff.) for 4h, measured using flow cytometry. Error bars represent SEM from at least 3 independent replicates.

**Figure S5. Tup1 is not required for short term *GAL1* memory.** Gal1-mCherry levels, normalized to the constitutively expressed CFP ( $P_{TDH}$ -CFP) upon reactivation during short-term memory in wild-type and *tup1* $\Delta$  cells, measured using flow cytometry. To induce short-term *GAL* memory, cells were shifted from glucose to galactose for 2h, back to glucose for 1h and then to galactose for reactivation. Error bars represent SEM from at least 3 independent replicates.

**Figure S6. GAL transcriptional memory is independent of Sko1.** Gal1-mCherry levels, normalized to the constitutively expressed CFP ( $P_{TDH}$ -CFP), were assayed in wild-type and *sko1* $\Delta$  cells at different times during activation (act) or during reactivation (react) after 12h of growth in glucose. Error bars represent SEM from at least 3 independent replicates.

**Figure S7. Loss of Mig1 promotes faster/stronger expression of GAL1 under all conditions.** A & B. Time course of RT-qPCR for *GAL1* expression relative to *ACT1* during activation (glucose  $\rightarrow$  galactose, A) and reactivation (galactose  $\rightarrow$  glucose, 12 h  $\rightarrow$  galactose, B) in wild-type and *mig1* $\Delta$  cells. Error bars represent SEM from at least 3 independent replicates.

## Supplementary Figures

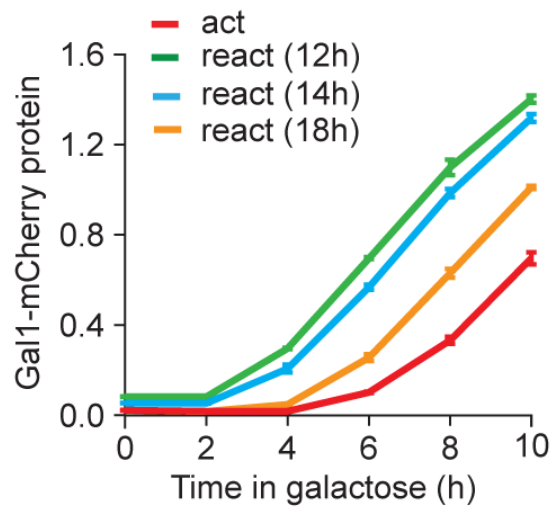

Sood *et al.*, Figure S1

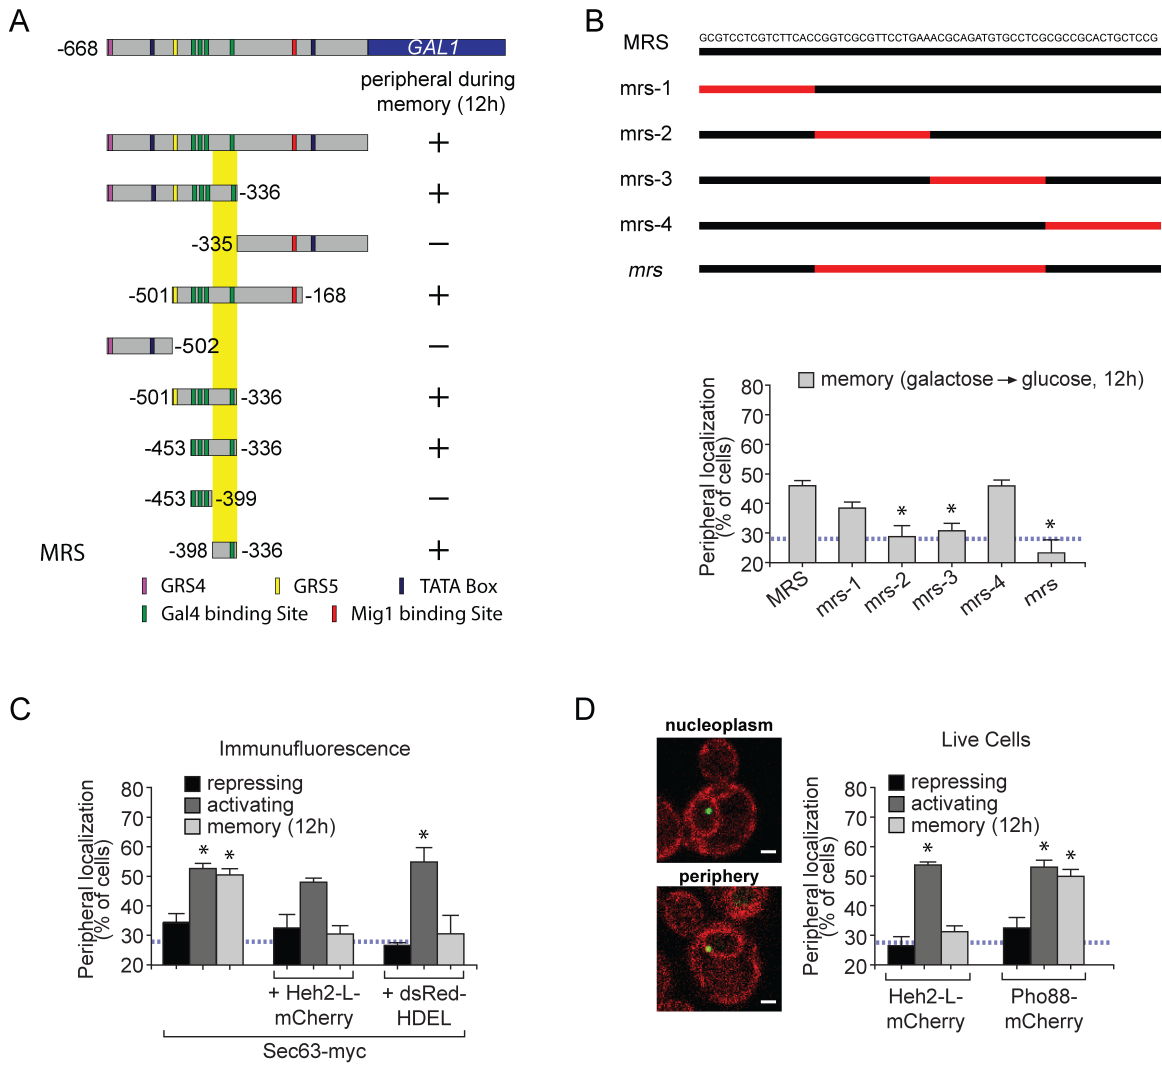

Sood *et al.*, Figure S2

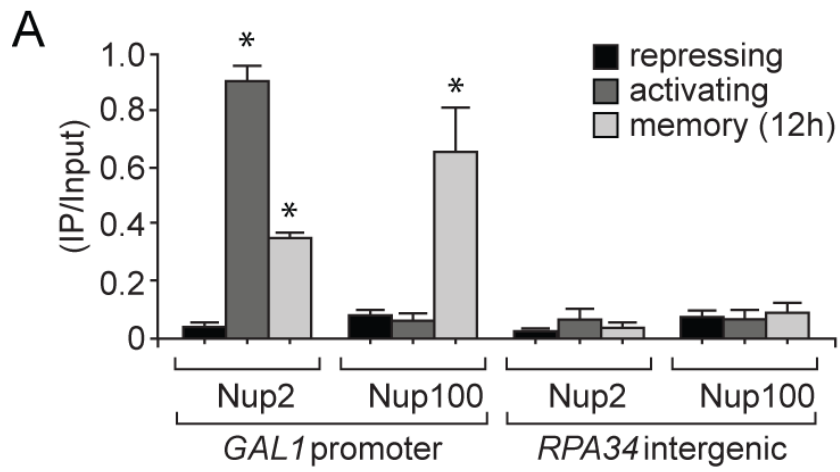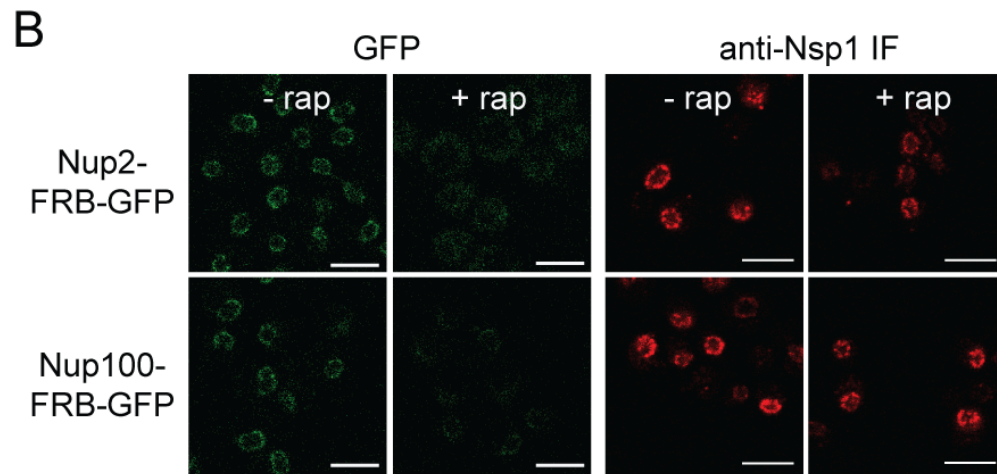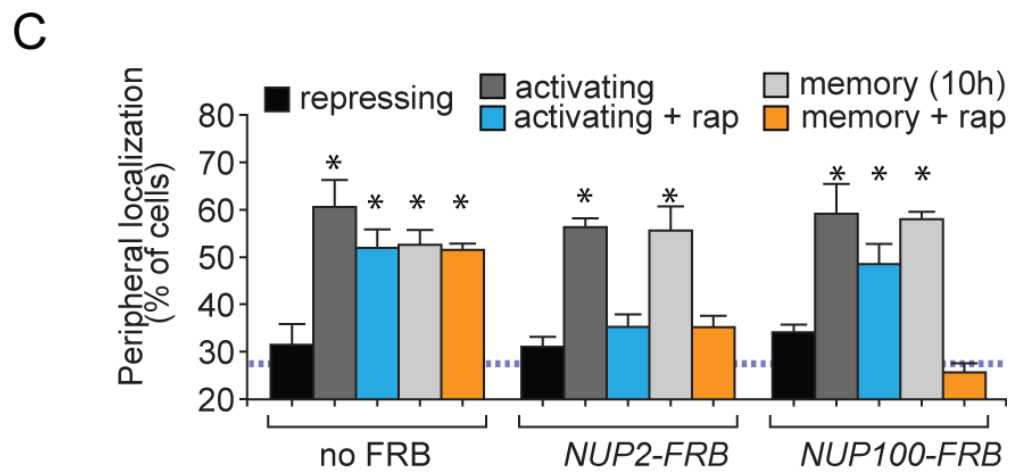

Sood *et al.*, Figure S3

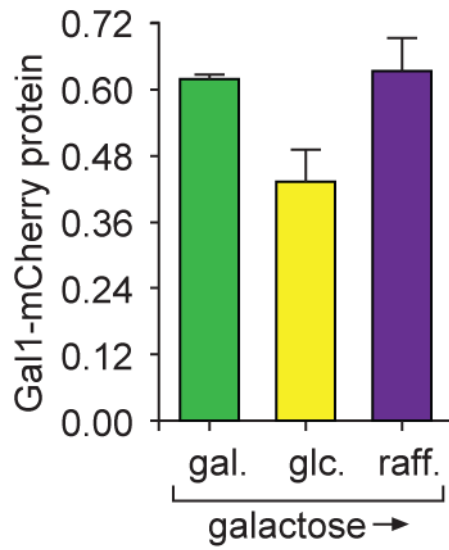

Sood *et al.*, Figure S4

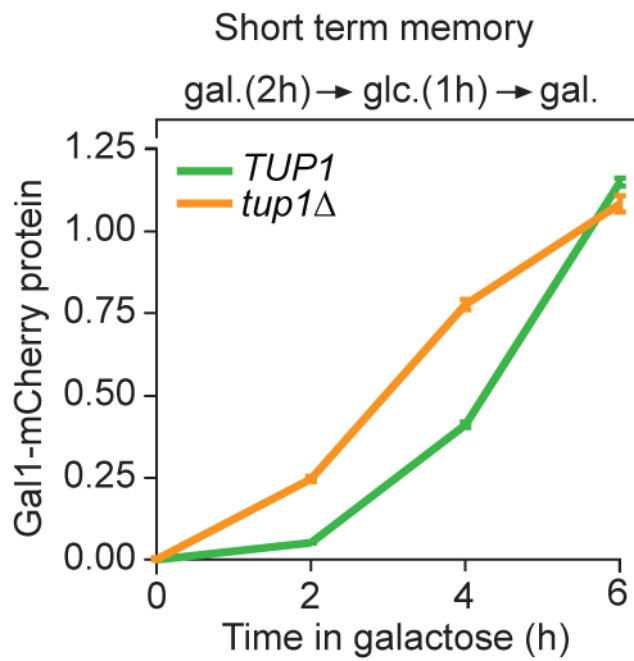

Sood *et al.*, Figure S5

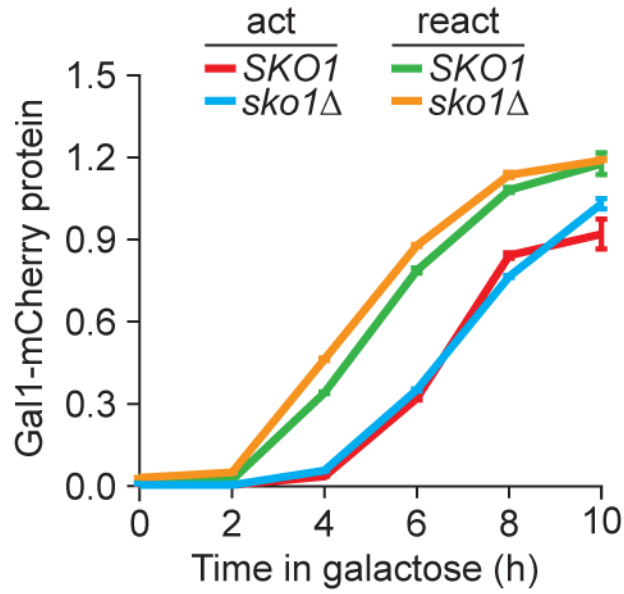

Sood *et al.*, Figure S6

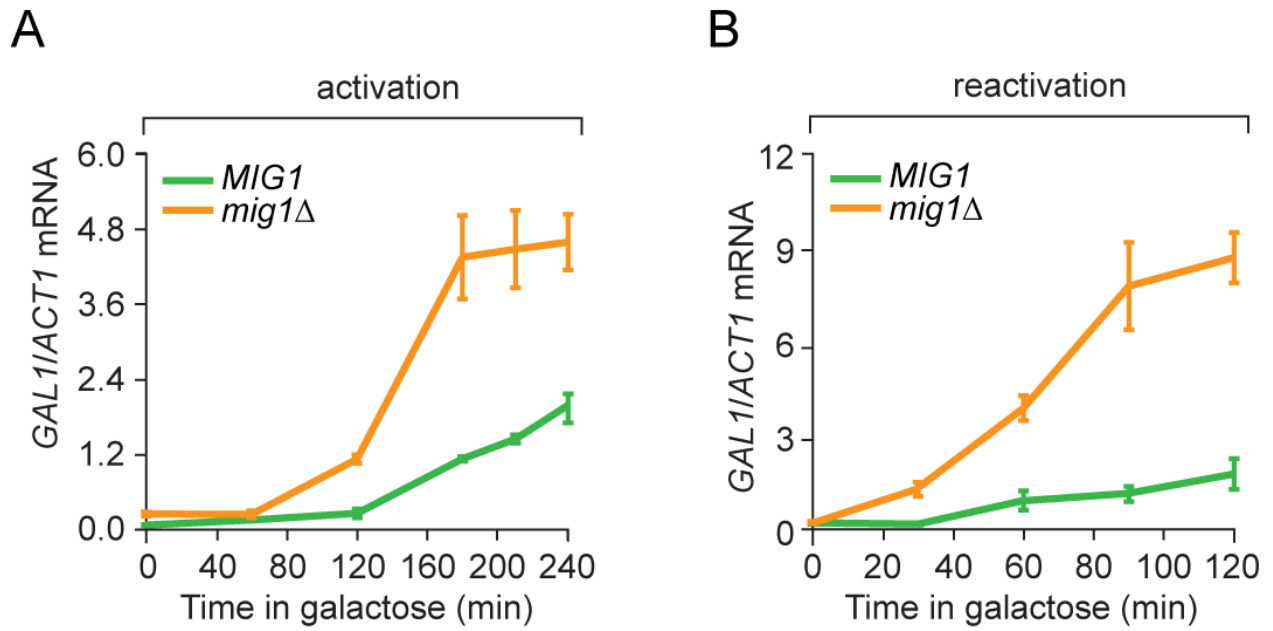

Sood *et al.*, Figure S7



## Supplementary Tables

**Table 1. Oligonucleotides used in this study**

| Name        | Sequence 5' to 3'                                                                         |
|-------------|-------------------------------------------------------------------------------------------|
| ACT1 CDS F  | GGTTATTGATAACGGTTCTGGTATG                                                                 |
| ACT1 CDS R  | ATGATACCTTGGTGTCTTGGTCTAC                                                                 |
| GAL1 CDS F  | GTTTCGATTTGCCGTTGGACGG                                                                    |
| GAL1 CDS R  | GGCAAACCTTTCCGGTGCAAG                                                                     |
| GAL1 prom F | CCCCACAAACCTTCAAATTAACG                                                                   |
| GAL1 prom R | CGCTTCGCTGATTAATTACCCC                                                                    |
| GAL2 CDS F  | TTGTTTCACAGCAACCCCAA                                                                      |
| GAL2 CDS R  | CAAAGCAAGGAAACGGTAACA                                                                     |
| GAL2 prom F | GATCACTCCGAACCGAGATTAG                                                                    |
| GAL2 prom R | GCACAGTTAACTTTCTAGCAGG                                                                    |
| MRS-1       | TCT TAC TCT TAT GCA TCG GTC GCG TTC CTG AAA CGC AGA TGT GCC<br>TCG CGC CGC ACT GCT CCG AT |
| MRS-2       | GCG TCC TCG TCT TCA CAG TTA GAG GTA CTT ACA CGC AGA TGT GCC<br>TCG CGC CGC ACT GCT CCG AT |
| MRS-3       | GCG TCC TCG TCT TCA CCG GTC GCG TTC CTG AAA GGA ATA GGT TCA<br>TAG CGC CGC ACT GCT CCG AT |
| MRS-4       | GCG TCC TCG TCT TCA CCG GTC GCG TTC CTG AAA CGC AGA TGT GCC<br>TCG AGA CTC AAG GAT ACT AT |
| <i>mrs</i>  | AGT TCG CGT GCA TTA CAC GCA TAG GGG AAT CGC GCC GCA CTG CTC<br>CGA ACA ATA AAG ATT CTA C  |
| GAL2 3' F   | ACGTGGATCCTTGAAATCTGAAGGCTGGA                                                             |
| GAL2 3' R   | ACGTGCGGCCGCGTTTGAACATTCTCACTCCA                                                          |
| BUD3 prom F | CATTCTACTGCTGCTACCT                                                                       |
| BUD3 prom R | TTTCAGAGTAAAGAGACGAC                                                                      |

|            |                                   |
|------------|-----------------------------------|
| Prm1 CDS F | TTA GTC TTT GGG TCA ATG TTC TCT G |
| Prm1 CDS R | ATC AGC AGT GCT TTC AAA CAT GGA A |
| GAL7 CDS F | TTCTAGCCATTCCCATAGACG             |
| GAL7 CDS R | TCCTGTTGACCTAACCAAGGT             |
| RPA34 F    | GCGTATGTGCGTATAACTGTGTGTAACATAAG  |
| RPA34 R    | CATTCATCAGTTCCACCAGCAGAAATGCC     |

**Table 2. Yeast strains used in this study**

| Strain Name | Genotype                                                                                                                               | Figures          |
|-------------|----------------------------------------------------------------------------------------------------------------------------------------|------------------|
| CRY1        | <i>MATa ade2-1 can1-100 his3-11,15 leu2-3,112 trp1-1 ura3-1</i>                                                                        |                  |
| CRY2        | <i>MATa ade2-1 can1-100 his3-11,15 leu2-3,112 trp1-1 ura3-1</i>                                                                        |                  |
| VSY057      | <i>MATa ade2-1 can1-100 his3-11,15 leu2-3,112 trp1-1 ura3-1 HO::P-TDH-CFP-NatMX GAL1-mCHERRY:KanMX6 URA3:ADH1pro-gal1-ΔSA</i>          | Figure 1         |
| VSY106      | <i>MATa his3Δ1 leu2Δ0 met15Δ0 ura3Δ0 GAL1-GFP:KanMx</i>                                                                                | Figure 1         |
| ICY083      | <i>MATa ade2-1 can1-100 his3-11,15 leu2-3,112 trp1-1 ura3-1 LEU2:LacI-GFP GAL1:URA3p6LacO128 TRP1:ADH1pro-GAL1</i>                     | Figure 1         |
| ICY075      | <i>MATa ade2-1 can1-100 his3-11,15 leu2-3,112 trp1-1 LEU2:LacI-GFP GAL2:URA3p6LacO128</i>                                              | Figure 1         |
| ICY150      | <i>MATa ade2-1 can1-100 his3-11,15 leu2-3,112 trp1-1 ura3-1 His5::gal1Δ LEU2:LacI-GFP GAL2:URA3p6LacO128</i>                           | Figure 1         |
| ICY167      | <i>MATa ade2-1 can1-100 his3-11,15 leu2-3,112 trp1-1 ura3-1 LEU2:LacI-GFP GAL2:URA3p6LacO128 TRP1:ADH1pro-GAL1</i>                     | Figure 1         |
| VSY034      | <i>MATa ade2-1 can1-100 his3-11,15 leu2-3,112 trp1-1 ura3-1 HO::P<sub>TDH</sub>-CFP-NatMX GAL1-mCHERRY:KanMX6</i>                      | Figure , S4, S5, |
| VSY057      | <i>MATa ade2-1 can1-100 his3-11,15 leu2-3,112 trp1-1 ura3-1 HO::P<sub>TDH</sub>-CFP-NatMX GAL1-mCHERRY:KanMX6 URA3:ADH1pro-GAL1</i>    | Figure 1,        |
| DBY032      | <i>MATa ade2-1 can1-100 his3-11,15 leu2-3,112 trp1-1 ura3-1 SEC63-13myc:Kan<sup>r</sup> HIS3:LacI-GFP GAL1:URA3p6LacO128</i>           | Figure 2         |
| VSY039      | <i>MAT a ade2-1 can1-100, his3-11,15 ura3-1 mrsGAL1</i>                                                                                | Figure 2         |
| VSY003      | <i>MAT a ade2-1 can1-100, his3-11,15 ura3-1 nup100Δ:KanMX6</i>                                                                         | Figure 2,        |
| VSY069      | <i>MATa ade2-1 can1-100 his3-11,15 leu2-3,112 trp1-1 ura3-1 Pho88-mCherry:HIS5 LEU2:LacI-GFP GAL1:URA3p6LacO128</i>                    | Figure2          |
| VSY089      | <i>MATa ade2-1 can1-100 his3-11,15 leu2-3,112 trp1-1 ura3-1 Pho88-mCherry:HIS5 LEU2:LacI-GFP GAL1:URA3p6LacO128 nup100Δ::KanMX6</i>    | Figure2          |
| ICY185      | <i>MATa ade2-1 can1-100, his3-11,15 ura3-1,112 trp1-1 ura3-1Sec63-myc::TRP1 LEU2:LacI-GFP URA3:p6LacO128-KanMX6</i>                    | Figure 2         |
| KVY001      | <i>MATa ade2-1 can1-100 his3-11,15 leu2-3,112 trp1-1 ura3-1 SEC63-13myc:Kan<sup>r</sup> HIS3:LacI-GFP URA3:GAL1prom-p6LacO128</i>      | Figure 2,        |
| ICY195      | <i>MATa ade2-1 can1-100, his3-11,15 ura3-1 Sec63-myc::TRP1 LEU2:LacI-GFP URA3:p6LacO128Amp<sup>r</sup>::Ab2.2-KanMX6</i>               | Figure 2,        |
| VSY096      | <i>MATa ade2-1 can1-100 his3-11,15 leu2-3,112 trp1-1 ura3-1 Pho88-mCherry:HIS5 LEU2:LacI-GFP URA3:p6LacO128Ab2.2</i>                   | Figure 2         |
| VSY097      | <i>MATa ade2-1 can1-100 his3-11,15 leu2-3,112 trp1-1 ura3-1 Pho88-mCherry:HIS5 LEU2:LacI-GFP URA3:p6LacO128Ab2.2 nup100Δ::KanMX</i>    | Figure 2         |
| VSY099      | <i>MATa ade2-1 can1-100 his3-11,15 leu2-3,112 trp1-1 ura3-1 Pho88-mCherry:HIS5 LEU2:LacI-GFP URA3:p6LacO128Ab2.2 TRP1:ADHprom-GAL1</i> | Figure 2         |

|        |                                                                                                                                           |           |
|--------|-------------------------------------------------------------------------------------------------------------------------------------------|-----------|
| VSY042 | <i>MATa ade2-1 can1-100, his3-11,15 ura3-1 TRP1:Sec63-13XMyc LEU2:LacI-GFP URA3:p6LacO128AmpΔ::GAL1prom-KanMX6</i>                        | Figure 2  |
| VSY043 | <i>MATa ade2-1 can1-100, his3-11,15 ura3-1 TRP1:Sec63-13XMyc LEU2:LacI-GFP URA3:p6LacO128AmpΔ::mrsGAL1prom-KanMX6</i>                     | Figure 2, |
| VSY047 | <i>MATa ade2-1 can1-100 his3-11,15 leu2-3,112 trp1-1 ura3-1 LEU2:LacI-GFP GAL1:URA3p6LacO128 TRP1:Sec63-13XMyc SEC63-13XMyc:KanMX6</i>    | Figure 2  |
| VSY048 | <i>MATa ade2-1 can1-100 his3-11,15 leu2-3,112 trp1-1 ura3-1 LEU2:LacI-GFP mrsGAL1:URA3p6LacO128 TRP1:Sec63-13XMyc SEC63-13XMyc:KanMX6</i> | Figure 2  |
| VSY100 | <i>MATa ade2-1 can1-100 his3-11,15 leu2-3,112 trp1-1 ura3-1 Pho88-mCherry:HIS5 LEU2:LacI-GFP GAL1:URA3p6LacO128</i>                       | Figure 2  |
| AFY28  | <i>MATa ade2-1 can1-100 his3-11,15 leu2-3,112 trp1-1 ura3-1,HIS3: LacIGFP SEC63-13myc:TRP1 nup100Δ::KANMX GAL1:URA3p6LacO128</i>          | Figure 2  |
| ICY176 | <i>MATa ade2-1 can1-100 his3-11,15 leu2-3,112 trp1-1 ura3-1 mig1Δ::His5+ LEU2:LacI-GFP GAL1:URA3p6LacO128</i>                             | Figure 3  |
| ICY63  | <i>MATa ade2-1 can1-100 his3-11,15 leu2-3,112 trp1-1 ura3-1 tup1Δ::His5 LEU2:LacI-GFP GAL1:URA3p6LacO128</i>                              | Figure 3  |
| VSY098 | <i>MATa ade2-1 can1-100 his3-11,15 leu2-3,112 trp1-1 ura3-1 Pho88-mCherry:HIS5 LEU2:LacI-GFP URA3:p6LacO128Ab2.2 tup1Δ::KanMX</i>         | Figure 3  |
| ICY29  | <i>MATa ade2-1 can1-100 his3-11,15 leu2-3,112 trp1-1 ura3-1 tup1::His5</i>                                                                | Figure 4, |
| VSY102 | <i>MATa ade2-1 can1-100, his3-11,15 HO::TDH1prm-CFP-NatMX GAL1-mCHERRY:KanMX6 tup1Δ::HIS5</i>                                             | Figure 4, |
| VSY103 | <i>MATa ade2-1 can1-100, his3-11,15 HO::TDH1prm-CFP-NatMX GAL1-mCHERRY:KanMX6 tup1Δ::HIS6 URA3:ADH1prom-GAL1</i>                          | Figure 4, |
| DBY051 | <i>MATalpha ade2-1 can1-100 his3-11,15 leu2-3,112 trp1-1 ura3-1 htz1Δ::HIS5 SEC63-13myc::KANMX HIS3:LacI-GFP GAL1:URA3p6LacO128</i>       | Figure 5  |
| ICY39  | <i>MATalpha ade2-1 can1-100 his3-11,15 leu2-3,112 trp1-1 ura3-1 htz1Δ::HIS5</i>                                                           | Figure 5  |
| ICY165 | <i>MATalpha ade2-1 can1-100 his3-11,15 leu2-3,112 trp1-1 ura3-1 htz1Δ::HIS5 URA3:ADH1pro-GAL1</i>                                         | Figure 5  |
| VSY094 | <i>MATa ade2-1 can1-100 his3-11,15 leu2-3,112 trp1-1 ura3-1 GAL1:URA3p6LacO128 SEC63-13myc:KanMX HIS3:LacI-GFP TRP1:Heh2-L-mCHERRY</i>    | Figure S2 |
| VSY095 | <i>MATa ade2-1 can1-100 his3-11,15 leu2-3,112 trp1-1 ura3-1 GAL1:URA3p6LacO128 SEC63-13myc:KanMX HIS3:LacI-GFP TRP1:dsRed-HDEL</i>        | Figure S2 |
| ICY186 | <i>MAT A ade2-1 can1-100, his3-11,15 ura3-1 Sec63-myc::TRP1 LEU2:LacI-GFP URA3:p6LacO128AmpΔ::GALproIA-KanMX6</i>                         | Figure S2 |
| ICY187 | <i>MAT A ade2-1 can1-100, his3-11,15 ura3-1 Sec63-myc::TRP1 LEU2:LacI-GFP URA3:p6LacO128AmpΔ::GALproIB-KanMX6</i>                         | Figure S2 |
| ICY188 | <i>MAT A ade2-1 can1-100, his3-11,15 ura3-1 Sec63-myc::TRP1 LEU2:LacI-GFP URA3:p6LacO128AmpΔ::GALproAb-KanMX6</i>                         | Figure S2 |
| ICY189 | <i>MAT A ade2-1 can1-100, his3-11,15 ura3-1 Sec63-myc::TRP1 LEU2:LacI-GFP URA3:p6LacO128AmpΔ::GALproAa-KanMX6</i>                         | Figure S2 |
| ICY190 | <i>MAT A ade2-1 can1-100, his3-11,15 ura3-1 Sec63-myc::TRP1 LEU2:LacI-GFP URA3:p6LacO128AmpΔ::GALproAa1-KanMX6</i>                        | Figure S2 |
| ICY191 | <i>MAT A ade2-1 can1-100, his3-11,15 ura3-1 Sec63-myc::TRP1 LEU2:LacI-GFP URA3:p6LacO128AmpΔ::GALproAa2-KanMX6</i>                        | Figure S2 |
| ICY192 | <i>MAT A ade2-1 can1-100, his3-11,15 ura3-1 Sec63-myc::TRP1 LEU2:LacI-GFP URA3:p6LacO128AmpΔ::GALproUAS1,2,4mut-KanMX6</i>                | Figure S2 |
| ICY193 | <i>MAT A ade2-1 can1-100, his3-11,15 ura3-1 Sec63-myc::TRP1 LEU2:LacI-GFP URA3:p6LacO128 SUP4-o</i>                                       | Figure S2 |
| ICY194 | <i>MAT A ade2-1 can1-100, his3-11,15 ura3-1 Sec63-myc::TRP1 LEU2:LacI-GFP URA3:p6LacO128AmpΔ::Ab2.1-KanMX6</i>                            | Figure S2 |
| VSY036 | <i>MAT a ade2-1 can1-100, his3-11,15 ura3-1 TRP1:Sec63-13XMyc LEU2:LacI-GFP URA3:p6LacO128AmpΔ::mrs1-KanMX6</i>                           | Figure S2 |
| VSY037 | <i>MAT a ade2-1 can1-100, his3-11,15 ura3-1 TRP1:Sec63-13XMyc LEU2:LacI-GFP URA3:p6LacO128AmpΔ::mrs2-KanMX6</i>                           | Figure S2 |
| VSY038 | <i>MAT a ade2-1 can1-100, his3-11,15 ura3-1 TRP1:Sec63-13XMyc LEU2:LacI-GFP URA3:p6LacO128AmpΔ::mrs3-KanMX6</i>                           | Figure S2 |

|            |                                                                                                                               |           |
|------------|-------------------------------------------------------------------------------------------------------------------------------|-----------|
| VSY039     | <i>MAT a ade2-1 can1-100, his3-11,15 ura3-1 TRP1:Sec63-13XMyc LEU2:LacI-GFP URA3:p6LacO128AmpΔ::mrs4-KanMX6</i>               | Figure S2 |
| VSY040     | <i>MAT a ade2-1 can1-100, his3-11,15 ura3-1 TRP1:Sec63-13XMyc LEU2:LacI-GFP URA3:p6LacO128AmpΔ::mrs-KanMX6</i>                | Figure S2 |
| Nup100-TAP | <i>MATa his3Δ1 leu2Δ0 met15Δ1 ura3Δ0 Nup100-TAP::His5+</i>                                                                    | Figure S3 |
| Nup2-TAP   | <i>MATa his3Δ1 leu2Δ0 met15Δ1 ura3Δ0 Nup12-TAP::His5+</i>                                                                     | Figure S3 |
| VSY090     | <i>MATalpha tor1-1 fpr1::NAT RPL13A-2×FKBP12::TRP1 LEU2:LacI-GFP Pho88-mCherry:HIS5 GAL1:URA3p6LacO128</i>                    | Figure S3 |
| VSY091     | <i>MATalpha tor1-1 fpr1::NAT RPL13A-2×FKBP12::TRP1 LEU2:LacI-GFP Pho88-mCherry:HIS5 GAL1:URA3p6LacO128 NUP2-FRB:KanMX6</i>    | Figure S3 |
| VSY092     | <i>MATalpha tor1-1 fpr1::NAT RPL13A-2×FKBP12::TRP1 LEU2:LacI-GFP Pho88-mCherry:HIS5 GAL1:URA3p6LacO128 NUP100-FRB:KanMX6</i>  | Figure S3 |
| ADY046     | <i>MATalpha tor1-1 fpr1::NAT RPL13A-2×FKBP12::TRP1 NUP100-FRB-GFP:HIS5</i>                                                    | Figure S3 |
| CEY346     | <i>MATalpha tor1-1 fpr1::NAT RPL13A-2×FKBP12::TRP1 NUP2-FRB-GFP:HIS5</i>                                                      | Figure S3 |
| VSY149     | <i>MATa ade2-1 can1-100 his3-11,15 leu2-3,112 trp1-1 ura3-1 HO::P<sub>TDH</sub>-CFP-NatMX GAL1-mCHERRY:KanMX6 sko1Δ::HIS5</i> | Figure S6 |
| VSY107     | <i>MATa ade2-1 can1-100 his3-11,15 leu2-3,112 trp1-1 ura3-1 mig1Δ::His5</i>                                                   | Figure S7 |

**Table 3. List of GFP tagged genes used for standard curve between GFP fluorescence and abundance**

|         |
|---------|
| YKL060C |
| YLL024C |
| YCR012W |
| YLR249W |
| YAL005C |
| YPL061W |
| YLR109W |
| YHL033C |
| YBR196C |
| YAL038W |
| YHR183W |
| YNL067W |
| YDR385W |
| YDR382W |
| YER091C |
| YPR035W |
| YPR035W |
| YDR447C |
| YGR254W |
| YDL185W |

### Supplement References

- Brickner, D. G., V. Sood, E. Tutucci, R. Coukos, K. Viets *et al.*, 2016 Subnuclear positioning and interchromosomal clustering of the GAL1-10 locus are controlled by separable, interdependent mechanisms. *Mol Biol Cell* 27: 2980-2993.
- Egecioglu, D. E., A. D'Urso, D. G. Brickner, W. H. Light and J. H. Brickner, 2014 Approaches to studying subnuclear organization and gene-nuclear pore interactions. *Methods Cell Biol* 122: 463-485.
- Green, E. M., Y. Jiang, R. Joyner and K. Weis, 2012 A negative feedback loop at the nuclear periphery regulates GAL gene expression. *Mol Biol Cell* 23: 1367-1375.
- Haruki, H., J. Nishikawa and U. K. Laemmli, 2008 The anchor-away technique: rapid, conditional establishment of yeast mutant phenotypes. *Mol Cell* 31: 925-932.
- Meinema, A. C., J. K. Laba, R. A. Hapsari, R. Otten, F. A. Mulder *et al.*, 2011 Long unfolded linkers facilitate membrane protein import through the nuclear pore complex. *Science* 333: 90-93.
